# Supplementary material for: Spatial iTME analysis of KRAS mutant NSCLC and immunotherapy outcome
Source: PubMed Central journal article supplement (PMC11187132; doi:10.1038/s41698-024-00626-6), 2024-06-19
Supplement: 41698_2024_626_MOESM1_ESM.pdf [file 41698_2024_626_MOESM1_ESM.pdf]

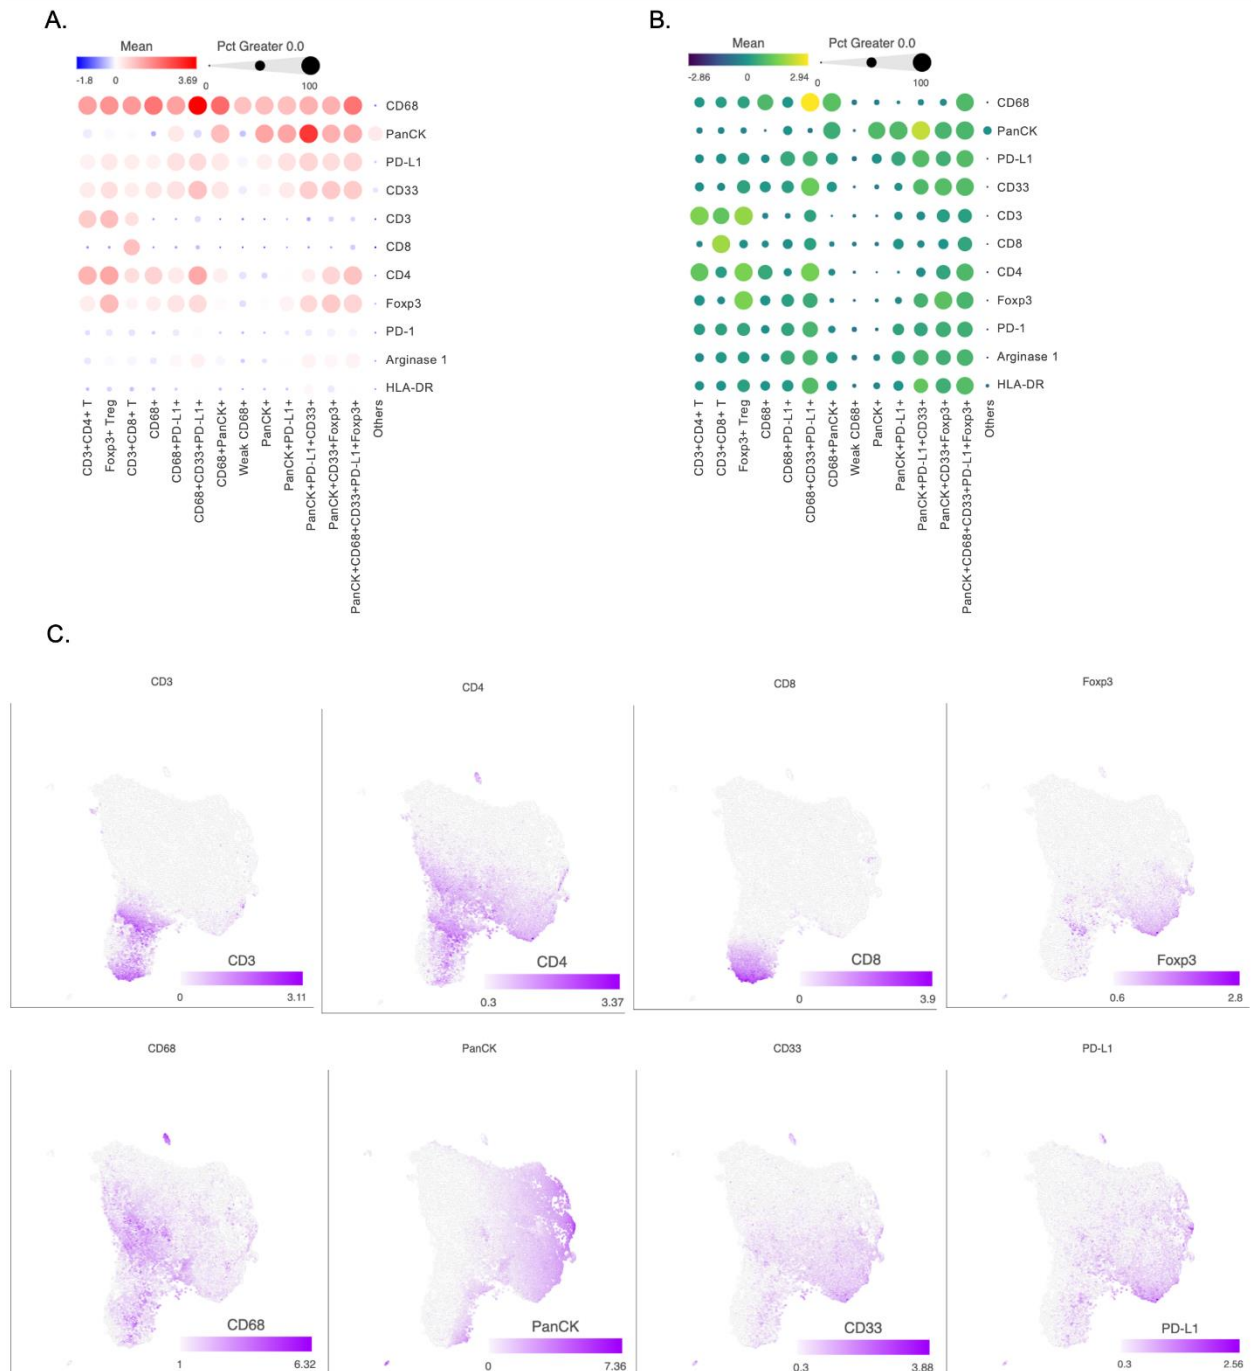

**Supplemental Figure 1. Marker Intensity and Cell Annotation**

**A.** Marker intensity per cell type. **B.** Z-score of marker intensity per cell type. **C.** Uniform Manifold Approximation and Projection (UMAP) color by marker intensity per cell.

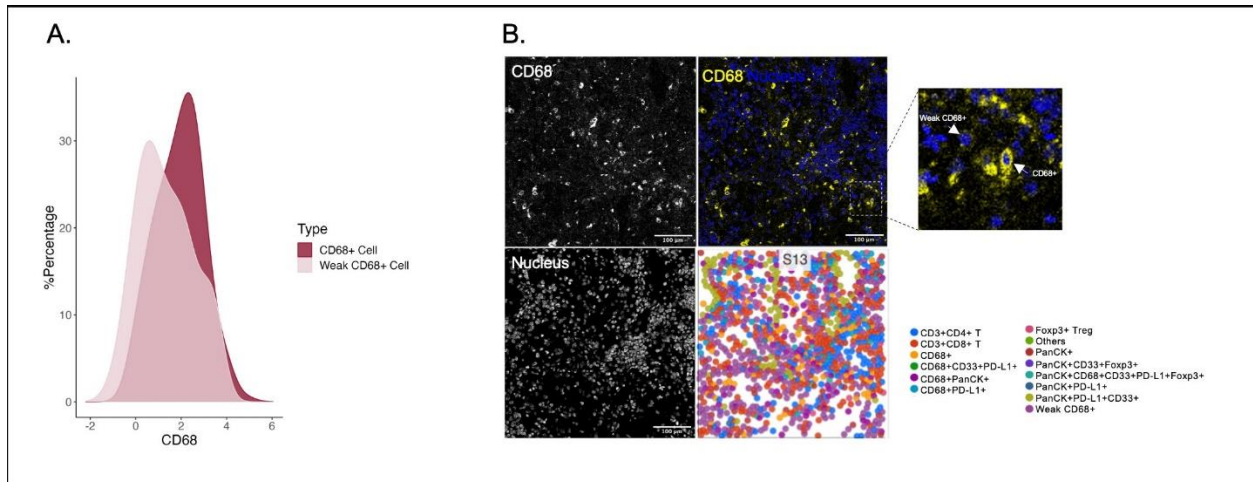

**Supplemental Figure 2. The CD68 intensity for CD68+ cell and weak CD68+ cell**

**A)** The CD68 Intensity for CD68+ cell and Weak CD68+ Cell; **B)** The CD68+ cell and Weak CD68+ cell on the IMC images and cell annotation map.

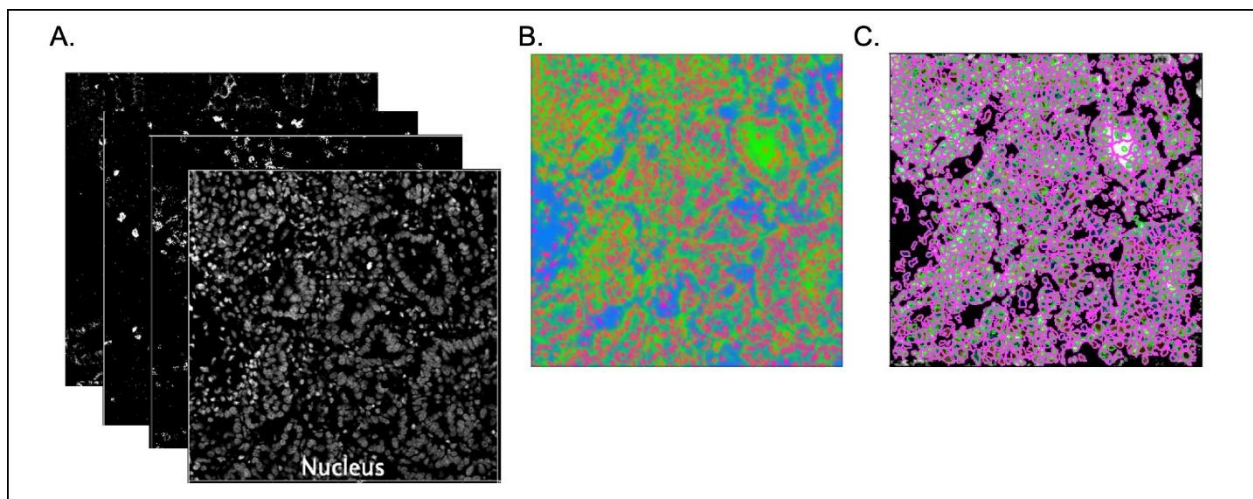

**Supplemental Figure 3. Cell segmentation. A)** The combination of markers for cell membrane and cell nuclear; **B)** The probability RGB image for cell nuclear (red), cell membrane (green), and background (blue); **C)** the cell segmentation analysis result overlaps with cell membrane probability image. The green line labels the nuclear and the purple line separates the cells.

**Supplemental Table 1. Treatment table**

| <b>Sample name</b> | <b>Immunotherapy</b> | <b>Combination or Monotherapy</b> |
|--------------------|----------------------|-----------------------------------|
| S01                | Atezolizumab         | Monotherapy                       |
| S02                | Nivolumab            | Monotherapy                       |
| S03                | Atezolizumab         | Monotherapy                       |
| S04                | Pembrolizumab        | carboplatin,<br>pemetrexed        |
| S05                | Pembrolizumab        | Monotherapy                       |
| S06                | Pembrolizumab        | carboplatin,<br>pemetrexed        |
| S07                | Nivolumab            | Monotherapy                       |
| S08                | Nivolumab            | Monotherapy                       |
| S09                | Pembrolizumab        | Monotherapy                       |
| S10                | Atezolizumab         | Monotherapy                       |
| S11                | Atezolizumab         | Monotherapy                       |
| S12                | Atezolizumab         | Monotherapy                       |
| S13                | Atezolizumab         | Monotherapy                       |
| S14                | Atezolizumab         | Monotherapy                       |
| S15                | Nivolumab            | Monotherapy                       |
| S17                | Nivolumab            | Monotherapy                       |
| S18                | Nivolumab            | Monotherapy                       |
| S19                | Nivolumab            | Monotherapy                       |
| S20                | Pembrolizumab        | Monotherapy                       |
| S21                | Atezolizumab         | Monotherapy                       |
| S22                | Atezolizumab         | Monotherapy                       |
| S23                | Pembrolizumab        | Monotherapy                       |
| S24                | Pembrolizumab        | carboplatin,<br>pemetrexed        |
| S25                | Pembrolizumab        | Monotherapy                       |
| S26                | Pembrolizumab        | carboplatin,<br>pemetrexed        |

**Supplemental Table 2. Immunotherapy responses**

| <b>Immunotherapy</b> | <b>PD</b>    | <b>PR</b>    | <b>p-value</b> |
|----------------------|--------------|--------------|----------------|
| Atezolizumab         | 5<br>(41.7%) | 4<br>(30.8%) | 0.85           |

|               |              |              |
|---------------|--------------|--------------|
| Nivolumab     | 3<br>(25.0%) | 4<br>(30.8%) |
| Pembrolizumab | 4<br>(33.3%) | 5<br>(38.5%) |

**Supplemental Table 3. Genomic Variation Associated with Response Status**

|                |          | PD         | PR          | p-value* |
|----------------|----------|------------|-------------|----------|
| <b>TP53</b>    | Negative | 6 (60.0%)  | 8 (61.5%)   | 1        |
|                | Mutated  | 4 (40.0%)  | 5 (38.5%)   |          |
| <b>LRP1B</b>   | Negative | 1 (25.0%)  | 4 (80.0%)   | 0.33     |
|                | Mutated  | 3 (75.0%)  | 1 (20.0%)   |          |
| <b>SPTA1</b>   | Negative | 4 (100.0%) | 4 (80.0%)   | 1        |
|                | Mutated  | 0          | 1 (20.0%)   |          |
| <b>ARID1B</b>  | Negative | 3 (75.0%)  | 5 (100.0%)  | 0.906    |
|                | Mutated  | 1 (25.0%)  | 0           |          |
| <b>SMARCA4</b> | Negative | 2 (40.0%)  | 6 (100.0%)  | 0.122    |
|                | Mutated  | 3 (60.0%)  | 0           |          |
| <b>MLL3</b>    | Negative | 3 (75.0%)  | 4 (80.0%)   | 1        |
|                | Mutated  | 1 (25.0%)  | 1 (20.0%)   |          |
| <b>STK11</b>   | Negative | 8 (80.0%)  | 13 (100.0%) | 0.347    |
|                | Mutated  | 2 (20.0%)  | 0           |          |
| <b>EPHA3</b>   | Negative | 3 (75.0%)  | 6 (100.0%)  | 0.83     |
|                | Mutated  | 1 (25.0%)  | 0           |          |
| <b>KEAP1</b>   | Negative | 2 (40.0%)  | 6 (100.0%)  | 0.122    |
|                | Mutated  | 3 (60.0%)  | 0           |          |
| <b>NKX2_1</b>  | Negative | 3 (75.0%)  | 5 (83.3%)   | 1        |
|                | Mutated  | 1 (25.0%)  | 1 (16.7%)   |          |
| <b>MLL</b>     | Negative | 3 (75.0%)  | 5 (100.0%)  | 0.906    |
|                | Mutated  | 1 (25.0%)  | 0           |          |
| <b>FAT1</b>    | Negative | 4 (100.0%) | 3 (60.0%)   | 0.53     |

|                |          |            |             |       |
|----------------|----------|------------|-------------|-------|
|                | Mutated  | 0          | 2 (40.0%)   |       |
| <b>ATM</b>     | Negative | 9 (100.0%) | 10 (76.9%)  | 0.358 |
|                | Mutated  | 0          | 3 (23.1%)   |       |
| <b>NF1</b>     | Negative | 4 (100.0%) | 5 (83.3%)   | 1     |
|                | Mutated  | 0          | 1 (16.7%)   |       |
| <b>CDKN2AB</b> | Negative | 4 (66.7%)  | 6 (100.0%)  | 0.439 |
|                | Mutated  | 2 (33.3%)  | 0           |       |
| <b>TSC2</b>    | Negative | 5 (83.3%)  | 6 (85.7%)   | 1     |
|                | Mutated  | 1 (16.7%)  | 1 (14.3%)   |       |
| <b>TET2</b>    | Negative | 3 (75.0%)  | 6 (100.0%)  | 0.83  |
|                | Mutated  | 1 (25.0%)  | 0           |       |
| <b>ARID2</b>   | Negative | 3 (75.0%)  | 4 (80.0%)   | 1     |
|                | Mutated  | 1 (25.0%)  | 1 (20.0%)   |       |
| <b>CDKN2A</b>  | Negative | 8 (88.9%)  | 12 (92.3%)  | 1     |
|                | Mutated  | 1 (11.1%)  | 1 (7.7%)    |       |
| <b>BRCA2</b>   | Negative | 9 (100.0%) | 12 (92.3%)  | 1     |
|                | Mutated  | 0          | 1 (7.7%)    |       |
| <b>MYC</b>     | Negative | 7 (87.5%)  | 8 (100.0%)  | 1     |
|                | Mutated  | 1 (12.5%)  | 0           |       |
| <b>ARID1A</b>  | Negative | 7 (87.5%)  | 4 (57.1%)   | 0.459 |
|                | Mutated  | 1 (12.5%)  | 3 (42.9%)   |       |
| <b>AR</b>      | Negative | 7 (87.5%)  | 7 (100.0%)  | 1     |
|                | Mutated  | 1 (12.5%)  | 0           |       |
| <b>MLL2</b>    | Negative | 3 (75.0%)  | 5 (100.0%)  | 0.906 |
|                | Mutated  | 1 (25.0%)  | 0           |       |
| <b>PIK3CA</b>  | Negative | 8 (88.9%)  | 13 (100.0%) | 0.85  |
|                | Mutated  | 1 (11.1%)  |             |       |
| <b>PRKDC</b>   | Negative | 4 (80.0%)  | 5 (100.0%)  | 1     |
|                | Mutated  | 1 (20.0%)  | 0           |       |

|               |          |            |             |       |
|---------------|----------|------------|-------------|-------|
| <b>NOTCH1</b> | Negative | 9 (100.0%) | 12 (92.3%)  | 1     |
|               | Mutated  | 0          | 1 (7.7%)    |       |
| <b>EGFR</b>   | Negative | 11 (91.7%) | 12 (92.3%)  | 1     |
|               | Mutated  | 1 (8.3%)   | 1 (7.7%)    |       |
| <b>APC</b>    | Negative | 9 (90.0%)  | 13 (100.0%) | 0.893 |
|               | Mutated  | 1 (10.0%)  | 0           |       |
| <b>FANCA</b>  | Negative | 6 (100.0%) | 6 (85.7%)   | 1     |
|               | Mutated  | 0          | 1 (14.3%)   |       |

\*Chi-square test. **PD**: progression of disease. **PR**: partial response.

**Supplemental Table 4. KRAS Variation Subtypes with Response Status**

| <b>KRAS Variations</b> | <b>PD</b> | <b>PR</b> | <b>p-value*</b> |
|------------------------|-----------|-----------|-----------------|
| <b>G12A</b>            | 0         | 2 (15.4%) | 0.485           |
| <b>G12C</b>            | 5 (41.7%) | 3 (23.1%) |                 |
| <b>G12D</b>            | 2 (16.7%) | 2 (15.4%) |                 |
| <b>G12V</b>            | 2 (16.7%) | 2 (15.4%) |                 |
| <b>Q61H</b>            | 0         | 2 (15.4%) |                 |
| <b>Q61L</b>            | 1(8.3%)   | 0         |                 |
| <b>others</b>          | 2 (16.7%) | 2 (15.4%) |                 |

\*Chi-square test. **PD**: progression of disease. **PR**: partial response.

**Supplemental Table 5. Antibody Panel**

| <b>Target</b>     | <b>Metal</b> | <b>Material ID*</b> |
|-------------------|--------------|---------------------|
| <b>CD3</b>        | 170Er        | 3170019D            |
| <b>CD4</b>        | 156Gd        | 3156033D            |
| <b>CD8</b>        | 162Dy        | 3162035D            |
| <b>FOXP3</b>      | 155Gd        | 3155016D            |
| <b>CD68</b>       | 159Tb        | 3159035D            |
| <b>Arginase-1</b> | 164Dy        | 3164027D            |
| <b>CD33</b>       | 145Nd        | 3145017D            |
| <b>HLA-DR</b>     | 174Yb        | 3174023D            |
| <b>PanCK</b>      | 148Nd        | 3148020D            |
| <b>PD-1</b>       | 165Ho        | 3165039D            |
| <b>PD-L1</b>      | 150Nd        | 3150031D            |

\*Fluidigm Corporation (South San Francisco, CA). **PD**: progression of disease. **PR**: partial response.

**Supplemental Table 6. Cell population by type and percentage**

| <b>Cell Type</b>           | <b>Cell Count</b> | <b>Percentage</b> |
|----------------------------|-------------------|-------------------|
| CD4 T Cell                 | 1409              | 6.6%              |
| CD68                       | 4397              | 20.7%             |
| CD68+CD33+PDL1             | 451               | 2.1%              |
| CD68+PanCK                 | 623               | 2.9%              |
| CD68+PDL1                  | 1501              | 7.1%              |
| CD8 T Cell                 | 3326              | 15.7%             |
| Foxp3+ Treg Cell           | 802               | 3.8%              |
| PanCK                      | 1720              | 8.1%              |
| PanCK+CD33+Foxp3           | 4790              | 22.6%             |
| PanCK+CD68+CD33+PDL1+Foxp3 | 950               | 4.5%              |
| PanCK+PDL1                 | 1555              | 7.3%              |
| PanCK+PDL1+CD33            | 980               | 4.6%              |
| weak CD68                  | 4697              | 22.1%             |
| others                     | 13                | 0.1%              |
